# Supplementary material for: A novel near-infrared fluorescent probe for the detection of sulfur dioxide derivatives and its application in biological imaging
Source: Royal Society of Chemistry journal article supplement (doi:10.1039/d2nj01414a), 2022-01-01
Supplement: d2nj01414a1.pdf [file d2nj01414a1.pdf]

## Electronic Supplementary Material

### **A novel near-infrared fluorescent probe for the detection of sulfur dioxide derivatives and its application in biological imaging**

Wanheng Wei<sup>a</sup>, Wenjie Liu<sup>a</sup>, Hongyan Zhang<sup>b\*</sup>, Zhanxian Li<sup>a\*</sup>, Mingming Yu<sup>a\*</sup>

\* Corresponding author.

<sup>a</sup> Green Catalysis Center and College of Chemistry, Zhengzhou University, Zhengzhou 450001, China.

E-mail: lizx@zzu.edu.cn, yummm@zzu.edu.cn.

<sup>b</sup> Beijing Key Laboratory of Clothing Materials R & D and Assessment, Beijing Engineering Research Center of Textile, Nanofiber, Beijing Institute of Fashion Technology, Beijing 100029, China. E-mail: zhyzzh@126.com.

## Table of Contents

### Figures

**Fig. S1**  $^1\text{H}$  NMR spectrum of B1.

**Fig. S2**  $^{13}\text{C}$  NMR spectrum of B1.

**Fig. S3**  $^1\text{H}$  NMR spectrum of B2.

**Fig. S4**  $^{13}\text{C}$  NMR spectrum of B2.

**Fig. S5**  $^1\text{H}$  NMR spectrum of HBQI.

**Fig. S6**  $^{13}\text{C}$  NMR spectrum of HBQI.

**Fig. S7** High-resolution mass spectrum of probe HBQI.

**Fig. S8** High-resolution mass spectrum of the product of reaction between probe HBQI and  $\text{HSO}_3^-$ .

# Figures

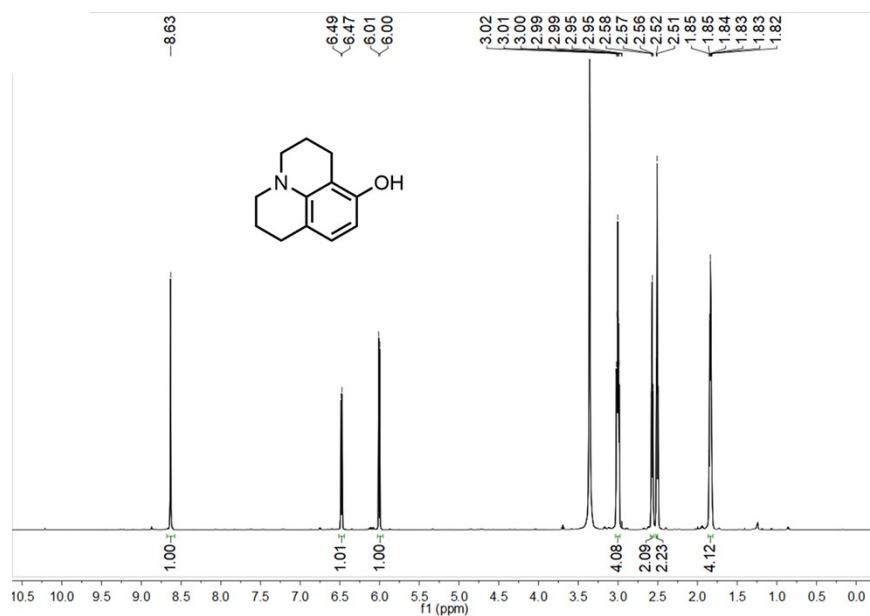

**Fig. S1** <sup>1</sup>H NMR spectrum of B1.

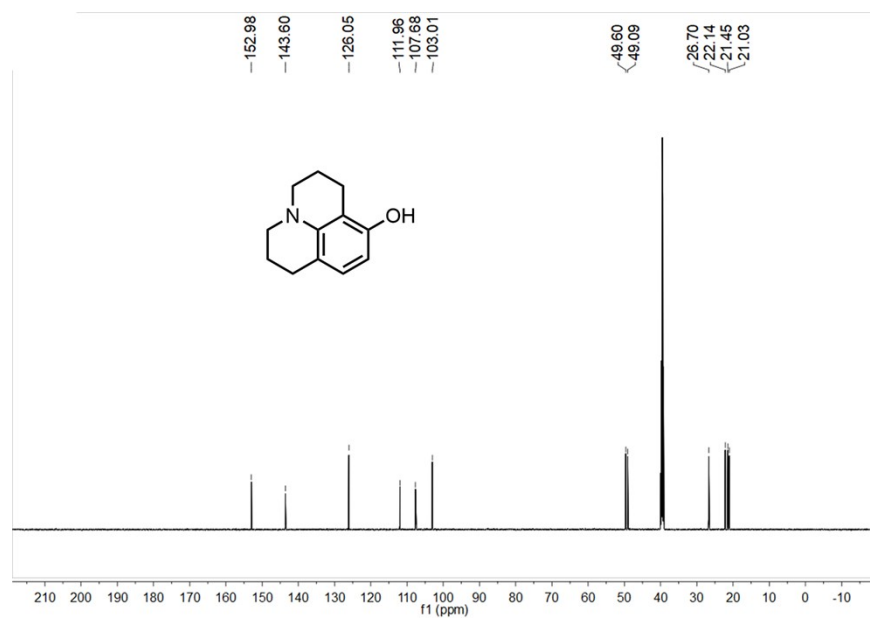

**Fig. S2** <sup>13</sup>C NMR spectrum of B1.

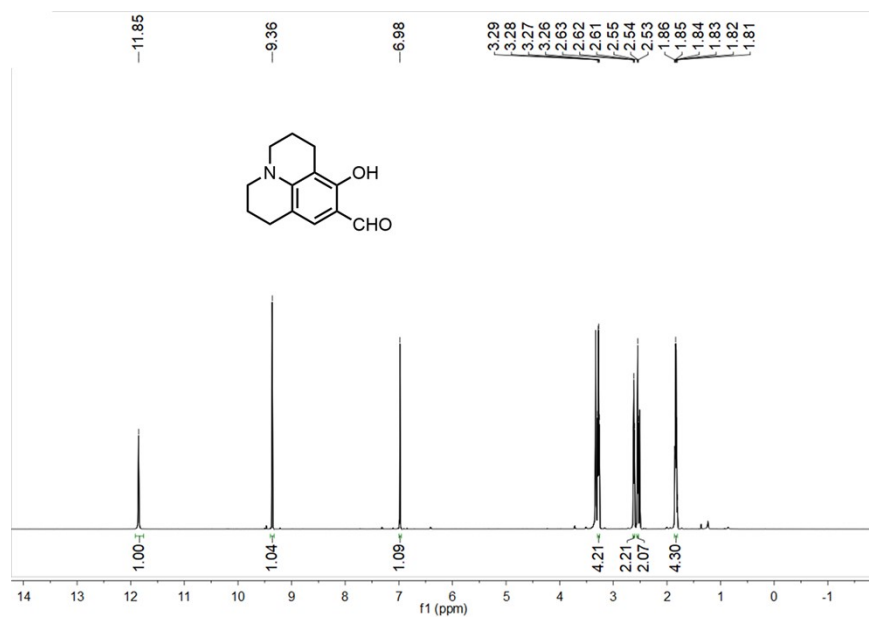

**Fig. S3**  $^1\text{H}$  NMR spectrum of B2.

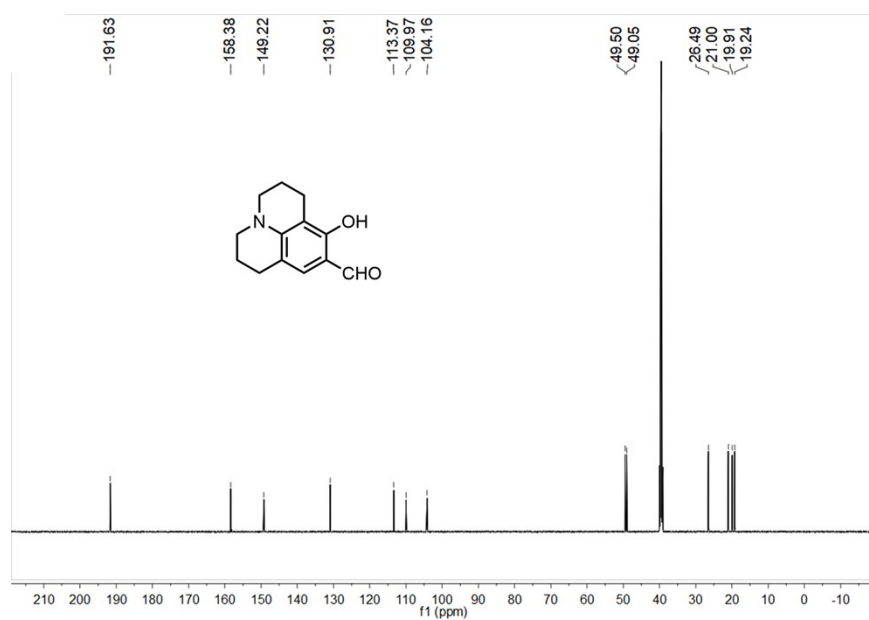

**Fig. S4**  $^{13}\text{C}$  NMR spectrum of B2.

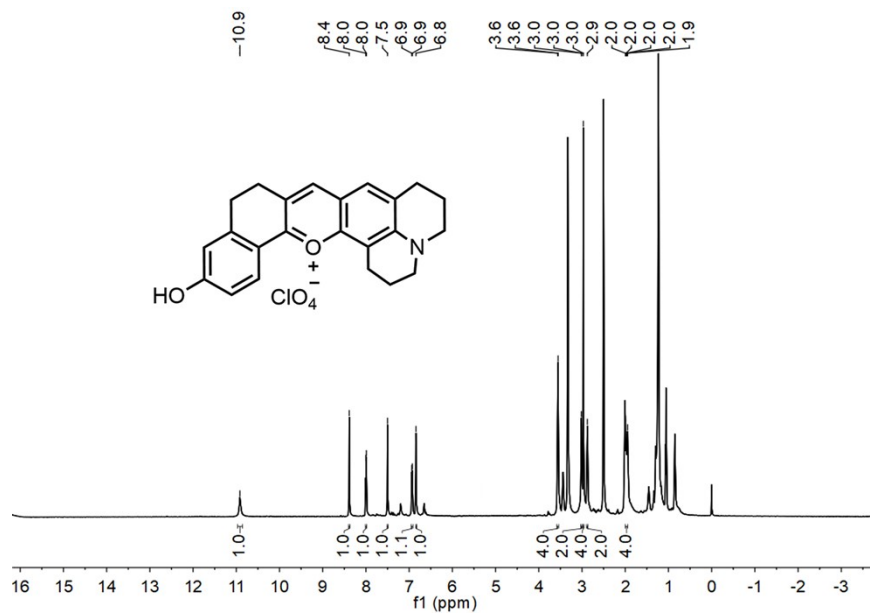

**Fig. S5**  $^1\text{H}$  NMR spectrum of HBQI.

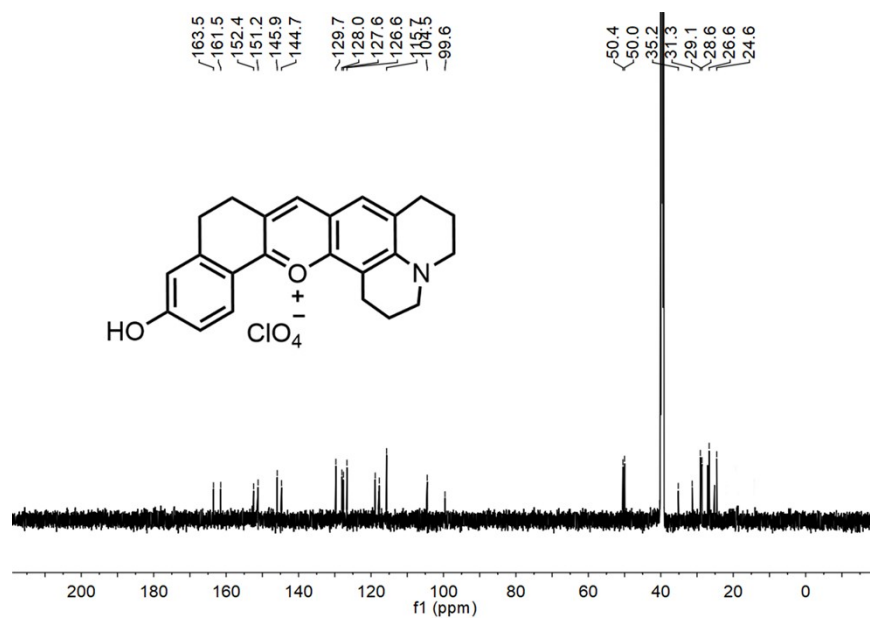

**Fig. S6**  $^{13}\text{C}$  NMR spectrum of HBQI.

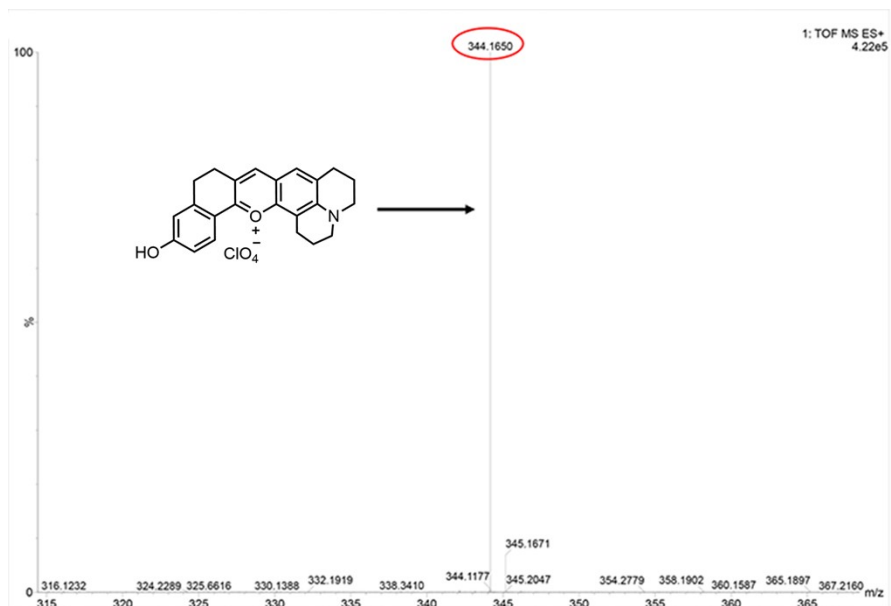

**Fig. S7** High-resolution mass spectrum of probe HBQI.

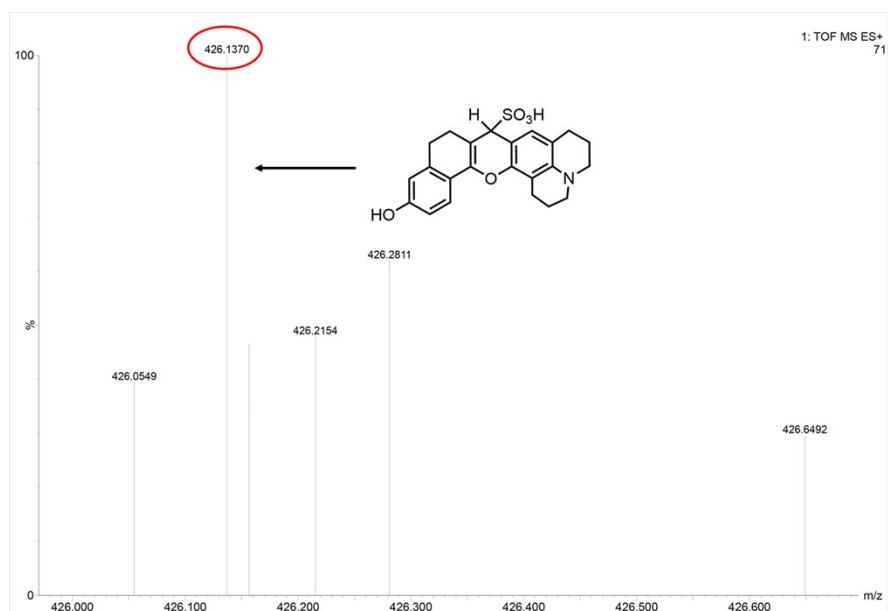

**Fig. S8** High-resolution mass spectrum of the product of reaction between probe HBQI and  $\text{HSO}_3^-$ .
